# Supplementary material for: Association of Protein Tyrosine Phosphatase 1B Gene Polymorphisms With Measures of Glucose Homeostasis in Hispanic Americans
Source: Oxford University Press journal article supplement (doi:10.2337/diabetes.53.11.3013), 2004-11-01

Supplemental Figure 1. Marker to marker D’(A) and r2(B) for the PTPN1 SNPs. Inter-SNP D' and r2 values are graphically represented using the Graphical Overview of Linkage Disequilibrium (GOLD) package which generates the color coded plot of the pair-wise disequilibrium statistics with horizontal and vertical axes that are scaled according to the inter-SNP distances


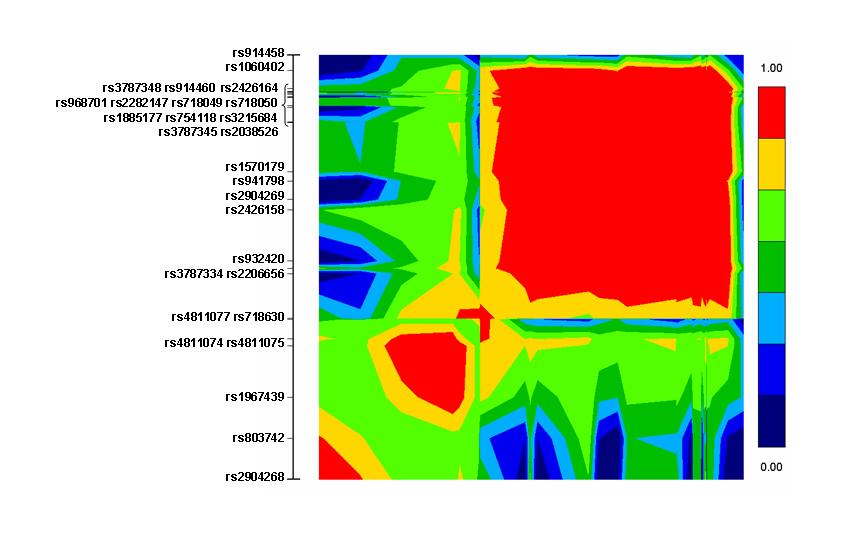

Supplement: 3013-sup-db001417_appendix.doc [file 3013-sup-db001417_appendix.doc]
